# Supplementary material for: A DNA tweezers-actuated regenerated DNAzyme nanoreactor: a fluorescence sensor for miRNA and adenosine detection
Source: Royal Society of Chemistry journal article supplement (doi:10.1039/d0ay00142b), 2020-01-01
Supplement: d0ay00142b1.pdf [file d0ay00142b1.pdf]

Supporting Information

**DNA tweezer-actuated regenerated DNAzyme nanoreactor:  
a fluorescence sensor for miRNA and adenosine detection**

Xueying Chen, Xinrui Fu, Yuanyu Wu, Yifan Jin and Wei Li\*

Key laboratory of Pharmaceutical Quality Control of Hebei Province, College of Pharmaceutical  
Science, Hebei University, Baoding 071002, P. R. China

\*Corresponding author: Tel: +8618131235217, Email: liwei\_91@126.com

Table S1 Oligonucleotide sequences used in this study

| Name        | 5'-3'                                                                                                                                       |
|-------------|---------------------------------------------------------------------------------------------------------------------------------------------|
| T1          | TTTT CGAC CGAG CGTG AATT AGTG ATCC GGAA CTCG CGCA<br>ATGA ACC TTTT                                                                          |
| T2          | TTTT TCAG CTGG CCTA TCTA AGAC TGAA CTCG CACC GCCG<br>GCAT AAGC TATG CGCT CTGC CGC TTTT                                                      |
| T3          | TTTT TTAG GAGA TGGC ACGT TAAT GAAT AGTC TCCA CTIG<br>CATC CGAG ATCC GAAC TGCT GCC TTTT                                                      |
| T4          | TTTT CGAG AGAA GGCT TGCC AGGT TACG TTCG TACA TCGT<br>CTGA GTT TTTT                                                                          |
| T5          | TTTT GGCA GCAG TTCA GGCC AGCT GA TTTT                                                                                                       |
| T6          | TTTT GGTT CATT GCGG AGTT CAGT CTTA GATG GATC TCGG<br>ATGC AAGG CCTT CTCT CG TTTT                                                            |
| T7          | ACTA TTCA TTAA CGTG TGTA CGAA CGTA ACCT GGCA ATGG AG<br>TTT TAGC TTAT CAGA CTGA TTT GGTG CCGA GTTC CGGA TCAC<br>TAAT TCCA TAGC TTAT GCCG GC |
| T8          | CATC TTCT CCGA GCCG GTCG ACGAT ACAA C TTTT TTTT GCGG<br>CAGA GCGA CGCT CGGT CG TTTT                                                         |
| T9          | AACT CAGA CGAC CATG TCCT AA TTTT AAAA GTTTG TATCG T<br>AAAT AGTT GGT                                                                        |
| Set strand  | TCAA CATC AGTC TGAT AAGC TA                                                                                                                 |
| Fuel strand | TAGC TTAT CAGA CTGA TGTT GA                                                                                                                 |
| miR-21      | UAGC UUAU CAGA CUGA UGUU GA                                                                                                                 |
| ST-miR-21   | UAGC UUAU CAGA CUGA UGUA GA                                                                                                                 |
| DT-miR-21   | UAGC UUAU CAGA CUGA AGUA GA                                                                                                                 |
| miR-155     | UUAA UGCU AAUC GUGA UAGG GGU                                                                                                                |
| Let-7a      | UGAG GUAG UAGG UUGU AUAG UU                                                                                                                 |
| T8-BHQ-3    | CATC TTCT CCGA GCCG GTCG ACGAT ACAA C TTTT TTTT (BHQ-<br>3) GCGG CAGA GCGA CGCT CGGT CG TTTT                                                |
| T9-Cy5      | AACT CAGA CGAC CATG TCCT AA (Cy5) TTTT AAAA GTTTG                                                                                           |

TATCG T AAAT AGTT GGT  
 MB 6-FAM-CCAC CACA TTCA AATT CACC AACT AT rA GG AAGA TGTT  
 ACGA GGCG GTGG TGG-Dabcyl  
 T8 with mutant CATC TTCT CCTA GCCI GTCG ACGAT ACAA C TTTT TTTT GCGG  
 DNAzyme CAGA GCGA CGCT CGGT CG TTTT  
 ACTA TTCA TTAA CGTG TGTA CGAA CGTA ACCT GGCA ATGG AG  
 T7 for AD TTT ACCT TCCT ACTC CCCC TTT GGTG CCGA GTTC CGGA TCAC  
 TAAT TCCA TAGC TTAT GCCG GC  
 Set for AD ACCTGGGGGAGTATTGCGGAGGAAGGT

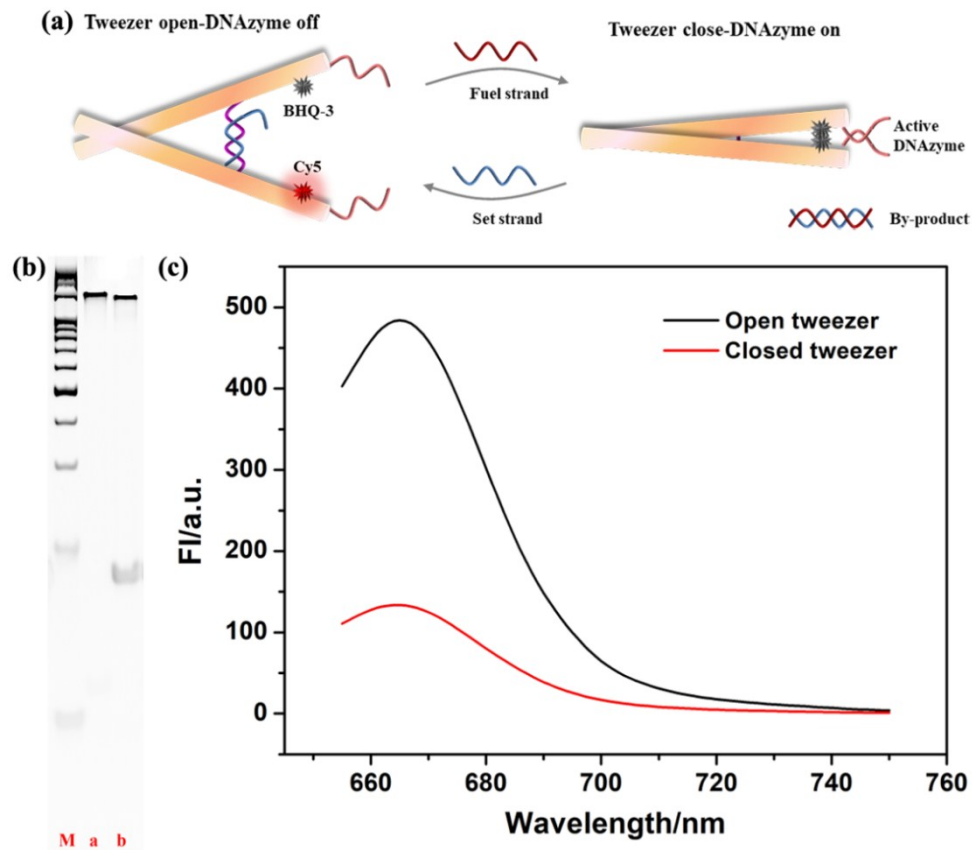

Figure S1 (a) Conformational switch of the DNA tweezer labeled with Cy5/BHQ-3 dye pairs. (b) Native PAGE for characterization of the assembled DNA tweezer. Lane a, assembled open tweezer; lane b, assembled open tweezer + fuel strand; lane M, DNA ladder marker. (c) Fluorescence spectra of Cy5 in assembled open tweezer and closed tweezer.

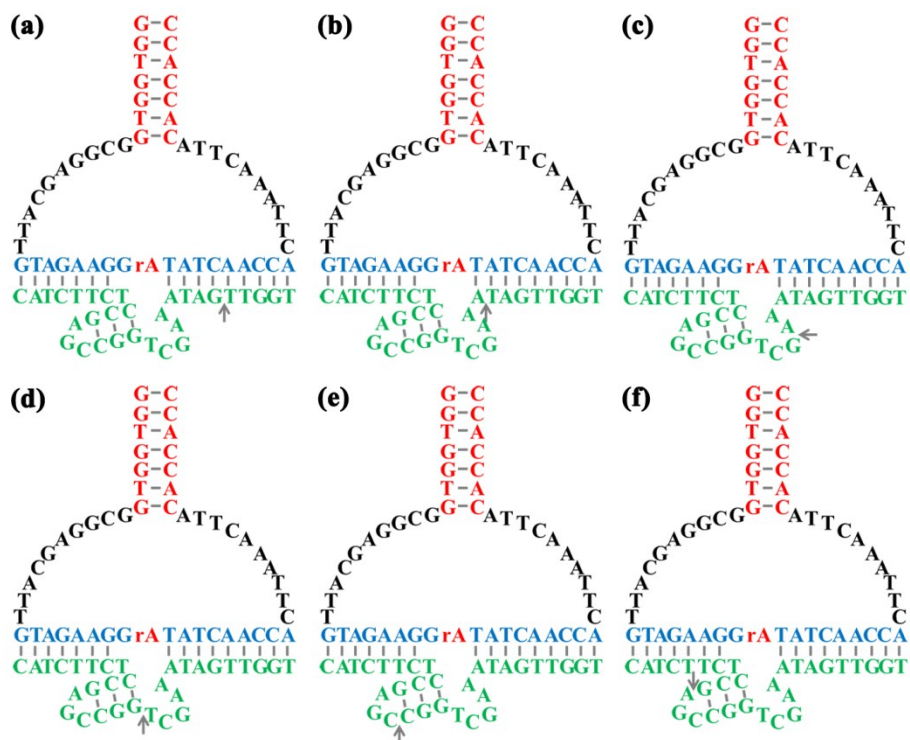

Figure S2 Schematic of the designed split DNAzymes. The gray arrows represent the split sites.

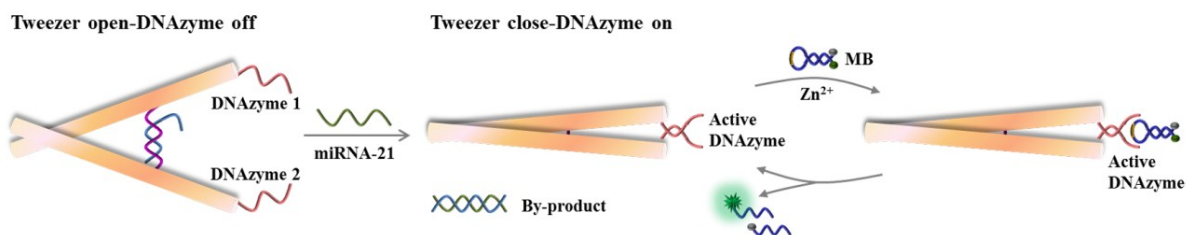

Figure S3 Schematic of the DNA tweezer actuated DNAzyme nanoreactor for miR-21 detection.

Table S2 Repeatability of this sensor for miR-21 detection

| Concentration | Sample 1<br>(FI) | Sample 2<br>(FI) | Sample 3<br>(FI) | Average<br>(FI) | RSD<br>(%) |
|---------------|------------------|------------------|------------------|-----------------|------------|
| 50 nM         | 2420             | 2395             | 2460             | 2425            | 1.35       |
| 0.5 nM        | 1438             | 1456             | 1419             | 1438            | 1.29       |
| 10 pM         | 874.1            | 844.8            | 854.3            | 857.7           | 1.74       |

Table S3 Reproducibility of this sensor for miR-21 detection

| Concentration | Sample 1<br>(FI) | Sample 2<br>(FI) | Sample 3<br>(FI) | Average<br>(FI) | RSD<br>(%) |
|---------------|------------------|------------------|------------------|-----------------|------------|
| 50 nM         | 2420             | 2466             | 2386             | 2424            | 1.66       |
| 0.5 nM        | 1438             | 1402             | 1411             | 1417            | 1.32       |
| 10 pM         | 874.1            | 825.4            | 811.3            | 836.9           | 3.94       |

Table S4 Recoveries of this sensor by spiking miR-21 in 100-fold diluted healthy serum

| Spiked | Detected | Recovery | RSD  |
|--------|----------|----------|------|
| 50 nM  | 50.51    | 101.0%   | 2.1% |
| 0.5 nM | 0.52     | 104.0%   | 2.3% |
| 10 pM  | 9.87     | 98.7%    | 3.7% |

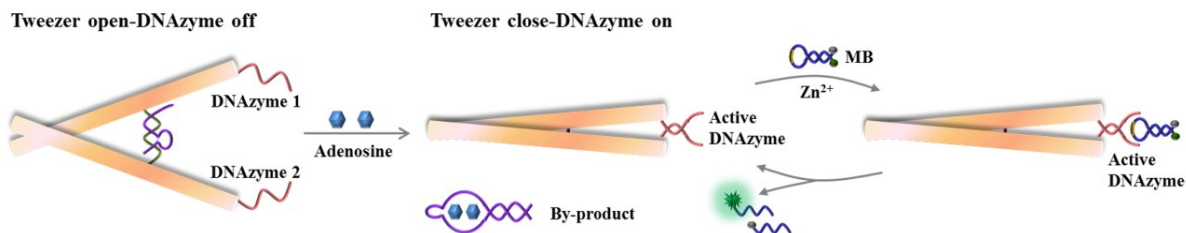

Figure S4 Schematic of the DNA tweezer actuated DNase nanoreactor for adenosine detection.

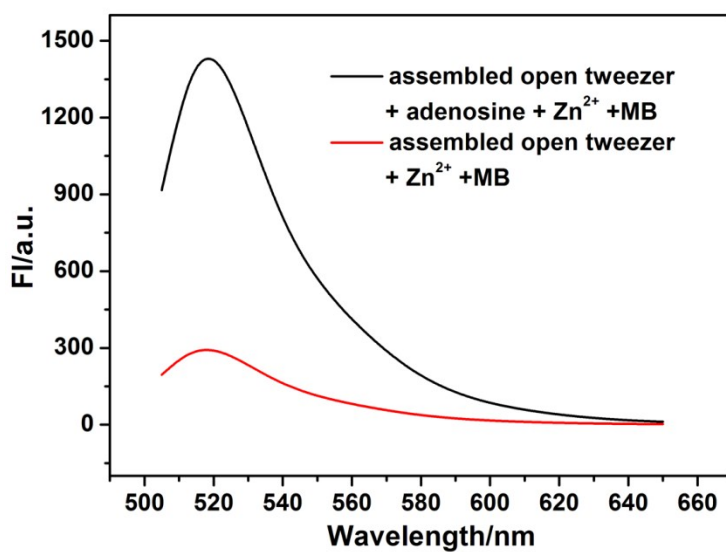

Figure S5 Fluorescence emission spectra with (in black) and without (in red) adenosine.

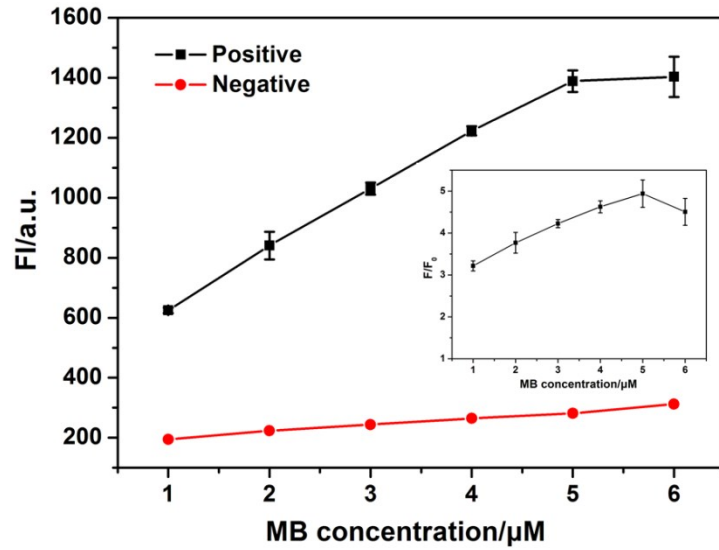

Figure S6 Effect of the MB concentration on fluorescence response. Inset shows the tendency of  $F/F_0$  under different MB concentration.

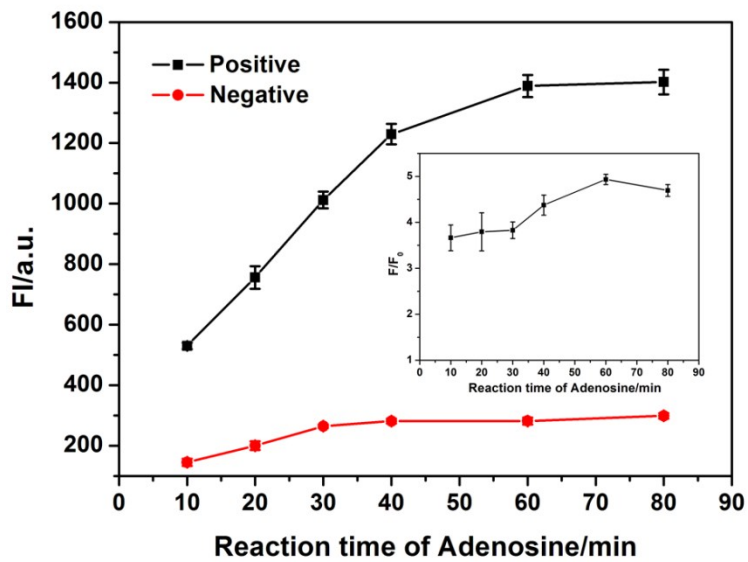

Figure S7 Effect of the adenosine reaction time on fluorescence response. Inset shows the tendency of  $F/F_0$  under different reaction time.

Table S5 Repeatability of this sensor for adenosine detection

| Concentration     | Sample 1<br>(FI) | Sample 2<br>(FI) | Sample 3<br>(FI) | Average<br>(FI) | RSD<br>(%) |
|-------------------|------------------|------------------|------------------|-----------------|------------|
| 10 $\mu\text{M}$  | 2127             | 2098             | 2115             | 2113.3          | 0.69       |
| 1.0 $\mu\text{M}$ | 1364             | 1372             | 1430             | 1388.7          | 2.59       |
| 0.5 $\mu\text{M}$ | 767.3            | 779.2            | 786.9            | 777.8           | 1.27       |

Table S6 Reproducibility of this sensor for adenosine detection

| Concentration     | Sample 1<br>(FI) | Sample 2<br>(FI) | Sample 3<br>(FI) | Average<br>(FI) | RSD<br>(%) |
|-------------------|------------------|------------------|------------------|-----------------|------------|
| 10 $\mu\text{M}$  | 2127             | 2131             | 2087             | 2115            | 1.15       |
| 1.0 $\mu\text{M}$ | 1364             | 1384             | 1413             | 1387            | 1.77       |
| 0.5 $\mu\text{M}$ | 767.3            | 782.5            | 815.9            | 788.6           | 3.15       |
